# Supplementary material
Source: PubMed Central journal article supplement (PMC8729568)

**Supplemental Material for *Gene expression profiling in kidney transplants with immune checkpoint inhibitor-associated adverse events***

Benjamin A. Adam, MD<sup>1</sup>, Naoka Murakami, MD, PhD<sup>2</sup>, Graeme Reid, MD<sup>1</sup>, Katie Du, BSc<sup>1</sup>, Ruqaya Jasim, PharmD<sup>1</sup>, Christie L. Boils, MD<sup>3</sup>, Lihong Bu, MD, PhD<sup>4</sup>, Peter D. Hill, MD<sup>5</sup>, Allan G. Murray, MD<sup>6</sup>, Karine Renaudin, MD, PhD<sup>7</sup>, Candice Roufosse, MD<sup>5</sup>, Astrid Weins, MD, PhD<sup>8</sup>, Kevin Wen, MD<sup>6</sup>, Leonardo V. Riella, MD, PhD<sup>9</sup>, Michael Mengel, MD<sup>1</sup>

<sup>1</sup>Department of Laboratory Medicine and Pathology, University of Alberta, Edmonton, AB, Canada

<sup>2</sup>Renal Division, Brigham and Women's Hospital, Boston, MA, USA

<sup>3</sup>Arkana Labs, Little Rock, AR, USA

<sup>4</sup>Department of Laboratory Medicine and Pathology, University of Minnesota, Minneapolis, MN, USA

<sup>5</sup>Centre for Inflammatory Disease, Department of Immunology and Inflammation, Faculty of Medicine, Imperial College, London, United Kingdom

<sup>6</sup>Division of Nephrology, Department of Medicine, University of Alberta, Edmonton, AB, Canada

<sup>7</sup>Department of Pathology, Nantes University Hospital, Nantes, France

<sup>8</sup>Department of Pathology, Brigham and Women's Hospital, Boston, MA, USA

<sup>9</sup>Division of Nephrology, Department of Medicine, Massachusetts General Hospital, Boston, MA, USA

## **Table of Contents**

**Supplemental Table 1.** 25 custom genes analyzed with NanoString PanCancer Immune Profiling Panel.

**Supplemental Table 2.** Significantly differentially expressed genes in T-cell mediated rejection (TCMR; n=15) versus non-immune checkpoint inhibitor drug-associated acute interstitial nephritis (Drug-AIN; n=15).

**Supplemental Table 3.** Significantly differentially expressed genes in non-immune checkpoint inhibitor drug-associated acute interstitial nephritis (Drug-AIN; n=15) versus T-cell mediated rejection (TCMR; n=15).

**Supplemental Figure 1.** Expression of T-cell mediated rejection 39-gene set and GZMB in discovery cohort.

**Supplemental Figure 2.** *IFI27* and *FOS* gene expression in discovery cohort T-cell mediated rejection according to Banff grade.

**Supplemental Figure 3.** Differential gene expression in validation cohort.

**Supplemental Table 1.** 25 custom genes analyzed with NanoString PanCancer Immune Profiling Panel.

| Gene     | Accession      | Target sequence                                                                                               |
|----------|----------------|---------------------------------------------------------------------------------------------------------------|
| ADAMDEC1 | NM_014479.2    | TTGACAACCTTCCTGAGATGGCACAGTTCTAACCTGGGGAAAAAGA<br>TCCACGACCATGCTCAGCTTCTCAGCGGGATTAGCTTCAACAATC<br>GACGTGTGGG |
| AIM2     | NM_004833.1    | TAGCAAGATATTATCGGCACAGTGGTTTTCTTAGAGGTAAATAGCG<br>CCTCACGTGTGTTAGATGCTGAATCTGACCAAAGGTTAATGTCC<br>CGCTGAACAT  |
| ANKRD22  | NM_144590.2    | ACTGGCAGAGCAAATATGACTCAGAAACCGGCTCCTCAGGGTTGT<br>AACATTAGATGATACAGGCTTGGGTGCTTACACATGACACCAGTG<br>CCTTTGTTTC  |
| AOAH     | NM_001637.3    | CTCTGGTGCTACAGGATTTCTGGACTCCACTGTTGGAATTAAGA<br>AAAATCTATTTACCTTCGCTTATGGAAAAGAAACCACTGTAATCAC<br>AGGGACTAC   |
| B2M      | NM_004048.2    | CGGGCATTCTGAAGCTGACAGCATTCTGGGCCGAGATGTCTCGC<br>TCCGTGGCCTTAGCTGTGCTCGCGCTACTCTCTCTTTCTGGCCTG<br>GAGGCTATCCA  |
| BASP1    | NM_006317.3    | GATCCGCGTCTGAAAGTGCAGTACATCGTTTGTACCTGAAACTGC<br>CGCCACATGCACTCCTCCACCGCTGAGAGTTGAATAGCTTTTCTT<br>CTGCAATGGG  |
| CD72     | NM_001782.2    | CCGCCATCTGCCTGGGAGTGCCTATCTGCAGGTGTCTCAGCAG<br>CTCCAGCAGACGAACAGGGTTCTGGAAGTCACTAACAGCAGCCT<br>GAGGCAGCAGCT   |
| GBP2     | NM_004120.3    | GAGCTTTTTTCCAGCATTTGTGTGGACTCTCAGAGATTTACCCTG<br>GAACTGGAAGTAGATGGAGAACCCATCACTGCTGATGACTACTTG<br>GAGCTTTTCG  |
| IGH      | AW575313.1     | AGGAGTCCTCCCTGACGGCCGAGGCAGGCGCTGGCCGCACTCC<br>CGCTCGAGTCTCCCTTCTGTCTGCAGATTCTGCGTGACAGTCAC<br>GGAACGGCGTGA   |
| IGHG1    | M87789.1       | GAGCACCTCTGGGGGCACAGCGGCCCTGGGCTGCCTGGTCAAG<br>GACTACTTCCCCGAACCGGTGACGGTGTGCTGGAACCTCAGGCGC<br>CCTGACCAGCGGC |
| IGHM     | AW134608.1     | TACAAAGGCATTGCTTTGTGAAGAACTGGAAATTGAGAAAGAAGC<br>CGGATCCTCTGCCACAGATAATGTGAGACACGTGGACACAGCGT<br>GTGTAGTCTGG  |
| IGHMBP2  | NM_002180.2    | GTCAACAACCATGCATTTTTGAAGACCCTGGTGGAGTATTTTACA<br>CAGCATGGGGAAAGTACGCACGGCCTTTGAGTATCTTGACGATATT<br>GTCCCAGAAA |
| IGKC     | J00241.1       | GAACTGTGGCTGCACCATCTGTCTTCATCTTCCCGCCATCTGATG<br>AGCAGTTGAAATCTGGAAGTGCCTCTGTTGTGTGCCTGCTGAATA<br>ACTTCTATCC  |
| IGKV1D-8 | Z00008.1       | CTGCTGCTCTGGCTCCCAGGTAAGGAAGGAGAACACTATGAATTT<br>ACTCAGCCAATGTGCTCAGTACAGCCTGGCCCTTCAGGGAAATTC<br>TCTTACTACA  |
| IGL      | U96394.1       | ACTCCTCATCTATAGGAATAATCAGCGGCCCTCAGGGGTCCCTGA<br>CCGATTCTCTGGCTCCAAGTCTGGCACCTCAGCCTCCCTGGCCAT<br>CAGTGGGCTC  |
| IGLJ3    | HF541920.1     | CTCCTTGGGGGCAAAGCTGCCCTGACCCTTTGGGTGCGCAGCC<br>TGAGGATGAGGCTGAATATACTGCTTGTCTCCTATAGTGGTATT<br>CGGGTGTTCG     |
| IGLL2    | L02326.1       | CGGGAATCTTGATGGTGACCTGGAAGGCAGATGGTACCCTCATC<br>ACCCAGAGCGTGGAGAAGACCACGCCCTCCAACAGAGCAACAA<br>CAAGTACGTGGC   |
| IL18BP   | NM_001039659.1 | CACAACTGGACACCAGACCTCAGCCCTTTGTGGGTCTGCTCCTG<br>TGTGCCACGTGCTCACTCTCCTGGTCAGAGCCACACCTGTCTCG<br>CAGACCACCA    |

|        |                |                                                                                                              |
|--------|----------------|--------------------------------------------------------------------------------------------------------------|
| JCHAIN | NM_144646.3    | GTGGAGCTGGATAATCAGATAGTTACTGCTACCCAGAGCAATATC<br>TGTGATGAAGACAGTGCTACAGAGACCTGCTACACTTATGACAGA<br>ACAAGTGCT  |
| NKG7   | NM_005601.3    | CTGTGGCGGTCCCCGTCCTGGCTATGAAACCTTGTGAGCAGAAG<br>GCAAGAGCGGCAAGATGAGTTTTGAGCGTTGTATTCCAAAGGCCT<br>CATCTGGAGCC |
| PSME1  | NM_006263.2    | AAAGGGAATGATCTATTGAGAGCCCTCTCTCCCATTCTGTGATGA<br>GTACAGCAGAGACCTTCCTGCTTTTTACTGGGGACTCCAGATTTT<br>CCCCAACTT  |
| PTPN7  | NM_002832.3    | CACCAACTACTCTTAGGGAGGCTAAGCAGTCTCTGTTTTGCTTCC<br>ATGGCTCAAATAATACCCTGGGTATGCAGGACCCACTATACCTTG<br>CATTGCTGA  |
| SLA    | NM_001045556.2 | CTTCTCATCACCACTTACTTTGAGGACTAGCCAAGAACAGACAC<br>AATGGTTCATGCCAAAAGGAACAGAAGTTCCAACCTATTGCCTGG<br>GATCTTGCGA  |
| SLAMF8 | NM_020125.2    | AGCTGGCGACGGGAGACAACCATGGACTTTGGTATGGAACCACA<br>CAGCCTCTTCACAGACGGACAGGTGCTGAGCATTTCCTGGGAC<br>CAGGAGACAGAG  |
| SP140  | NM_001005176.2 | GGTTCTTCAGAGAAAACAAGGTGGAGATTGCAAGTGCAATAACAA<br>GGCCATTTCTTTCTTATGGGCCTCCGAGACCGCTCCTTCATCT<br>CCGAGCAGAT   |

---

**Supplemental Table 2.** Significantly differentially expressed genes in T-cell mediated rejection (TCMR; n=15) versus non-immune checkpoint inhibitor drug-associated acute interstitial nephritis (Drug-AIN; n=15).

| <b>Gene symbol</b> | <b>Fold change (TCMR vs. Drug-AIN)</b> | <b>Unadjusted P-value</b> | <b>Adjusted P-value (false discovery rate)</b> |
|--------------------|----------------------------------------|---------------------------|------------------------------------------------|
| <i>TNFRSF14</i>    | 1.63                                   | <0.001                    | 0.008                                          |
| <i>IL32</i>        | 3.73                                   | <0.001                    | 0.009                                          |
| <i>CX3CL1</i>      | 1.51                                   | <0.001                    | 0.009                                          |
| <i>BCL2</i>        | 1.34                                   | 0.001                     | 0.010                                          |
| <i>HMGB1</i>       | 1.59                                   | 0.001                     | 0.010                                          |
| <i>STAT2</i>       | 1.55                                   | 0.001                     | 0.013                                          |
| <i>STAT5B</i>      | 1.19                                   | 0.001                     | 0.014                                          |
| <i>PSMB7</i>       | 1.36                                   | 0.001                     | 0.014                                          |
| <i>IFI27</i>       | 1.71                                   | 0.002                     | 0.016                                          |
| <i>HLA-E</i>       | 1.87                                   | 0.002                     | 0.017                                          |
| <i>IFIT1</i>       | 1.49                                   | 0.002                     | 0.017                                          |
| <i>CHUK</i>        | 1.35                                   | 0.002                     | 0.017                                          |
| <i>F2RL1</i>       | 1.47                                   | 0.002                     | 0.018                                          |
| <i>IRF1</i>        | 2.94                                   | 0.002                     | 0.018                                          |
| <i>CXCL9</i>       | 3.20                                   | 0.003                     | 0.018                                          |
| <i>MX1</i>         | 1.59                                   | 0.003                     | 0.020                                          |
| <i>MAPK3</i>       | 1.26                                   | 0.003                     | 0.020                                          |
| <i>ILF3</i>        | 1.23                                   | 0.004                     | 0.024                                          |
| <i>LAG3</i>        | 4.42                                   | 0.004                     | 0.026                                          |
| <i>SMAD3</i>       | 1.31                                   | 0.005                     | 0.026                                          |
| <i>LAMP2</i>       | 1.46                                   | 0.005                     | 0.028                                          |
| <i>PSMB8</i>       | 2.05                                   | 0.006                     | 0.031                                          |
| <i>IKBKB</i>       | 1.37                                   | 0.007                     | 0.034                                          |
| <i>HLA-C</i>       | 1.93                                   | 0.007                     | 0.034                                          |
| <i>STAT1</i>       | 2.29                                   | 0.007                     | 0.034                                          |
| <i>CXCL11</i>      | 4.16                                   | 0.008                     | 0.035                                          |
| <i>IL6R</i>        | 1.45                                   | 0.008                     | 0.035                                          |
| <i>NFKBIA</i>      | 1.61                                   | 0.008                     | 0.035                                          |
| <i>CXCL10</i>      | 3.12                                   | 0.010                     | 0.045                                          |
| <i>PSMB9</i>       | 2.00                                   | 0.010                     | 0.046                                          |

**Supplemental Table 3.** Significantly differentially expressed genes in non-immune checkpoint inhibitor drug-associated acute interstitial nephritis (Drug-AIN; n=15) versus T-cell mediated rejection (TCMR; n=15).

| <b>Gene symbol</b> | <b>Fold change (Drug-AIN vs. TCMR)</b> | <b>Unadjusted P-value</b> | <b>Adjusted P-value (false discovery rate)</b> |
|--------------------|----------------------------------------|---------------------------|------------------------------------------------|
| <i>MPPED1</i>      | 6.50                                   | <0.001                    | 0.002                                          |
| <i>CCL26</i>       | 5.78                                   | <0.001                    | 0.002                                          |
| <i>CD1E</i>        | 4.24                                   | <0.001                    | 0.004                                          |
| <i>CTSG</i>        | 3.07                                   | <0.001                    | 0.004                                          |
| <i>OSM</i>         | 5.51                                   | <0.001                    | 0.004                                          |
| <i>RRAD</i>        | 5.07                                   | <0.001                    | 0.004                                          |
| <i>S100A7</i>      | 5.98                                   | <0.001                    | 0.004                                          |
| <i>KIR3DL3</i>     | 4.36                                   | <0.001                    | 0.006                                          |
| <i>CD1C</i>        | 2.46                                   | <0.001                    | 0.006                                          |
| <i>IL13</i>        | 4.41                                   | <0.001                    | 0.006                                          |
| <i>CCL22</i>       | 3.67                                   | <0.001                    | 0.006                                          |
| <i>CCL17</i>       | 2.82                                   | <0.001                    | 0.006                                          |
| <i>IGLL1</i>       | 4.12                                   | <0.001                    | 0.006                                          |
| <i>FOXP3</i>       | 3.56                                   | <0.001                    | 0.006                                          |
| <i>IL8</i>         | 3.67                                   | <0.001                    | 0.006                                          |
| <i>CCR4</i>        | 3.69                                   | <0.001                    | 0.006                                          |
| <i>C4BPA</i>       | 3.40                                   | <0.001                    | 0.006                                          |
| <i>CCL20</i>       | 2.93                                   | <0.001                    | 0.007                                          |
| <i>CD1A</i>        | 4.36                                   | <0.001                    | 0.007                                          |
| <i>IFNL2</i>       | 5.97                                   | <0.001                    | 0.007                                          |
| <i>PTGDR2</i>      | 6.30                                   | <0.001                    | 0.007                                          |
| <i>IGH</i>         | 7.03                                   | <0.001                    | 0.007                                          |
| <i>MS4A2</i>       | 2.55                                   | <0.001                    | 0.008                                          |
| <i>NCAM1</i>       | 3.18                                   | <0.001                    | 0.008                                          |
| <i>IL24</i>        | 3.83                                   | <0.001                    | 0.008                                          |
| <i>IL25</i>        | 4.51                                   | <0.001                    | 0.008                                          |
| <i>CMA1</i>        | 2.04                                   | <0.001                    | 0.008                                          |
| <i>CEACAM6</i>     | 5.48                                   | <0.001                    | 0.008                                          |
| <i>FUT5</i>        | 5.09                                   | <0.001                    | 0.008                                          |
| <i>PRG2</i>        | 3.96                                   | <0.001                    | 0.008                                          |
| <i>ULBP2</i>       | 6.18                                   | <0.001                    | 0.009                                          |
| <i>C8A</i>         | 3.65                                   | <0.001                    | 0.009                                          |
| <i>AIRE</i>        | 5.50                                   | <0.001                    | 0.009                                          |
| <i>CCL16</i>       | 4.62                                   | <0.001                    | 0.009                                          |
| <i>IL17F</i>       | 3.65                                   | <0.001                    | 0.009                                          |
| <i>ITGA2B</i>      | 6.31                                   | <0.001                    | 0.009                                          |
| <i>KIR3DL2</i>     | 5.19                                   | <0.001                    | 0.009                                          |
| <i>FEZ1</i>        | 2.22                                   | <0.001                    | 0.009                                          |
| <i>CCL1</i>        | 4.94                                   | <0.001                    | 0.009                                          |
| <i>ICAM4</i>       | 4.26                                   | <0.001                    | 0.009                                          |
| <i>IGKV1D-8</i>    | 5.19                                   | <0.001                    | 0.009                                          |
| <i>CXCR1</i>       | 3.05                                   | <0.001                    | 0.009                                          |
| <i>IL12RB2</i>     | 2.09                                   | <0.001                    | 0.010                                          |

|                 |      |        |       |
|-----------------|------|--------|-------|
| <i>MNX1</i>     | 5.14 | <0.001 | 0.010 |
| <i>IFNB1</i>    | 7.07 | <0.001 | 0.010 |
| <i>IL22RA1</i>  | 3.17 | <0.001 | 0.010 |
| <i>CHIT1</i>    | 4.98 | <0.001 | 0.010 |
| <i>CLU</i>      | 5.78 | <0.001 | 0.010 |
| <i>CD55</i>     | 4.29 | <0.001 | 0.010 |
| <i>CXCL6</i>    | 3.86 | <0.001 | 0.010 |
| <i>TREM2</i>    | 3.53 | <0.001 | 0.011 |
| <i>MASP2</i>    | 3.52 | <0.001 | 0.011 |
| <i>TNFRSF8</i>  | 3.06 | <0.001 | 0.011 |
| <i>CXCL5</i>    | 5.41 | 0.001  | 0.012 |
| <i>CD70</i>     | 3.92 | 0.001  | 0.012 |
| <i>CSF2</i>     | 2.92 | 0.001  | 0.013 |
| <i>IL7</i>      | 3.36 | 0.001  | 0.013 |
| <i>CCL25</i>    | 4.02 | 0.001  | 0.014 |
| <i>CCL23</i>    | 2.83 | 0.001  | 0.014 |
| <i>POU2AF1</i>  | 2.89 | 0.001  | 0.014 |
| <i>CCR3</i>     | 5.78 | 0.001  | 0.014 |
| <i>F12</i>      | 3.68 | 0.001  | 0.014 |
| <i>IL3RA</i>    | 1.63 | 0.001  | 0.014 |
| <i>CXCR2</i>    | 2.73 | 0.001  | 0.014 |
| <i>JAM3</i>     | 1.47 | 0.001  | 0.014 |
| <i>CD207</i>    | 5.08 | 0.001  | 0.014 |
| <i>IFNAR1</i>   | 1.53 | 0.002  | 0.014 |
| <i>FUT7</i>     | 3.92 | 0.002  | 0.014 |
| <i>TAL1</i>     | 2.65 | 0.002  | 0.015 |
| <i>BST1</i>     | 1.36 | 0.002  | 0.015 |
| <i>SPINK5</i>   | 3.23 | 0.002  | 0.016 |
| <i>IFNA7</i>    | 5.05 | 0.002  | 0.016 |
| <i>IL23R</i>    | 4.04 | 0.002  | 0.016 |
| <i>TPSAB1</i>   | 2.67 | 0.002  | 0.016 |
| <i>CAMP</i>     | 5.10 | 0.002  | 0.016 |
| <i>C6</i>       | 3.15 | 0.002  | 0.016 |
| <i>ELANE</i>    | 2.53 | 0.002  | 0.016 |
| <i>TREM1</i>    | 3.76 | 0.002  | 0.016 |
| <i>ARG1</i>     | 4.88 | 0.002  | 0.016 |
| <i>IL5RA</i>    | 4.12 | 0.002  | 0.016 |
| <i>NUP107</i>   | 1.27 | 0.002  | 0.016 |
| <i>LTF</i>      | 3.05 | 0.002  | 0.017 |
| <i>CD83</i>     | 1.48 | 0.002  | 0.017 |
| <i>CLEC6A</i>   | 3.88 | 0.002  | 0.017 |
| <i>IL26</i>     | 4.81 | 0.002  | 0.017 |
| <i>LILRA4</i>   | 1.99 | 0.002  | 0.018 |
| <i>KIR3DL1</i>  | 5.03 | 0.002  | 0.018 |
| <i>SELE</i>     | 2.36 | 0.003  | 0.018 |
| <i>PLA2G1B</i>  | 3.83 | 0.003  | 0.018 |
| <i>TNFRSF18</i> | 2.35 | 0.003  | 0.018 |
| <i>IFNA8</i>    | 4.52 | 0.003  | 0.019 |
| <i>C9</i>       | 2.60 | 0.003  | 0.019 |

|                  |      |       |       |
|------------------|------|-------|-------|
| <i>IL22</i>      | 3.39 | 0.003 | 0.019 |
| <i>CEACAM8</i>   | 3.86 | 0.003 | 0.019 |
| <i>IL1RAPL2</i>  | 2.42 | 0.003 | 0.020 |
| <i>CCR9</i>      | 3.52 | 0.003 | 0.020 |
| <i>IFNA17</i>    | 7.76 | 0.003 | 0.020 |
| <i>IFNA2</i>     | 4.71 | 0.003 | 0.021 |
| <i>PPARG</i>     | 1.85 | 0.003 | 0.021 |
| <i>CD40LG</i>    | 2.07 | 0.003 | 0.021 |
| <i>CXCL1</i>     | 1.90 | 0.004 | 0.023 |
| <i>SAA1</i>      | 3.56 | 0.004 | 0.023 |
| <i>PTGS2</i>     | 2.30 | 0.004 | 0.023 |
| <i>TLR9</i>      | 4.03 | 0.004 | 0.024 |
| <i>TNFRSF12A</i> | 1.62 | 0.004 | 0.024 |
| <i>IL5</i>       | 5.26 | 0.004 | 0.025 |
| <i>CD37</i>      | 1.97 | 0.004 | 0.025 |
| <i>PMCH</i>      | 3.43 | 0.005 | 0.026 |
| <i>LAMP3</i>     | 1.86 | 0.005 | 0.026 |
| <i>LTK</i>       | 3.17 | 0.005 | 0.026 |
| <i>TNFRSF4</i>   | 2.01 | 0.005 | 0.026 |
| <i>ATM</i>       | 3.52 | 0.005 | 0.028 |
| <i>IL12B</i>     | 3.67 | 0.005 | 0.028 |
| <i>IL4</i>       | 4.80 | 0.005 | 0.029 |
| <i>IL3</i>       | 2.67 | 0.006 | 0.031 |
| <i>CASP10</i>    | 3.36 | 0.006 | 0.031 |
| <i>LY9</i>       | 1.98 | 0.006 | 0.031 |
| <i>CCR6</i>      | 2.67 | 0.006 | 0.031 |
| <i>RAG1</i>      | 2.39 | 0.006 | 0.032 |
| <i>TGFB2</i>     | 1.72 | 0.007 | 0.033 |
| <i>KIR2DS1</i>   | 4.66 | 0.007 | 0.033 |
| <i>ITGB4</i>     | 1.64 | 0.007 | 0.034 |
| <i>FCER1A</i>    | 3.86 | 0.007 | 0.034 |
| <i>IL1A</i>      | 4.51 | 0.007 | 0.034 |
| <i>IL23A</i>     | 3.14 | 0.007 | 0.034 |
| <i>IL27</i>      | 4.49 | 0.007 | 0.035 |
| <i>CXCR5</i>     | 2.19 | 0.008 | 0.035 |
| <i>LRRN3</i>     | 2.21 | 0.008 | 0.035 |
| <i>TNFSF4</i>    | 2.56 | 0.008 | 0.035 |
| <i>ADORA2A</i>   | 2.29 | 0.008 | 0.036 |
| <i>LTA</i>       | 3.32 | 0.008 | 0.037 |
| <i>PAX5</i>      | 3.17 | 0.008 | 0.038 |
| <i>NFATC4</i>    | 1.72 | 0.009 | 0.041 |
| <i>IL2</i>       | 4.13 | 0.009 | 0.041 |
| <i>IL1B</i>      | 2.21 | 0.010 | 0.046 |
| <i>MBL2</i>      | 2.64 | 0.010 | 0.046 |
| <i>CLEC4C</i>    | 1.76 | 0.011 | 0.046 |
| <i>FCGR2B</i>    | 1.59 | 0.011 | 0.047 |
| <i>NCR1</i>      | 2.06 | 0.011 | 0.047 |
| <i>IL17A</i>     | 1.55 | 0.011 | 0.048 |

---



**Supplemental Figure 1. Expression of T-cell mediated rejection 39-gene set and GZMB in discovery cohort.** Aggregate gene set including the following 39 genes previously reported to be associated with T-cell mediated rejection demonstrates no significant differential expression between TCMR and ICI-AIN groups in the discovery cohort ( $P=0.683$ ): ADAMDEC1, AIM2, ANKRD22, AOA, BCL2, BTLA, CD274, CD28, CD3D, CD4, CD72, CD84, CD86, CD8A, CD8B, CD96, CRP, CTLA4, CXCL10, CXCL13, CXCL9, CXCR6, GZMB, ICOS, IFNG, IL12RB1, IL18BP, IL1RL1, IL21R, IL4, LAG3, PTPN7, SH2D1A, SLA, SLAMF8, SP140, TAP1, TIGIT, TNFSF8. Representative single gene analysis of GZMB demonstrates relatively higher mean expression in TCMR vs. ICI-AIN, but this difference does not reach statistical significance ( $P=0.196$ ). ICI-AIN, immune checkpoint inhibitor-associated acute interstitial nephritis; TCMR, T-cell mediated rejection.

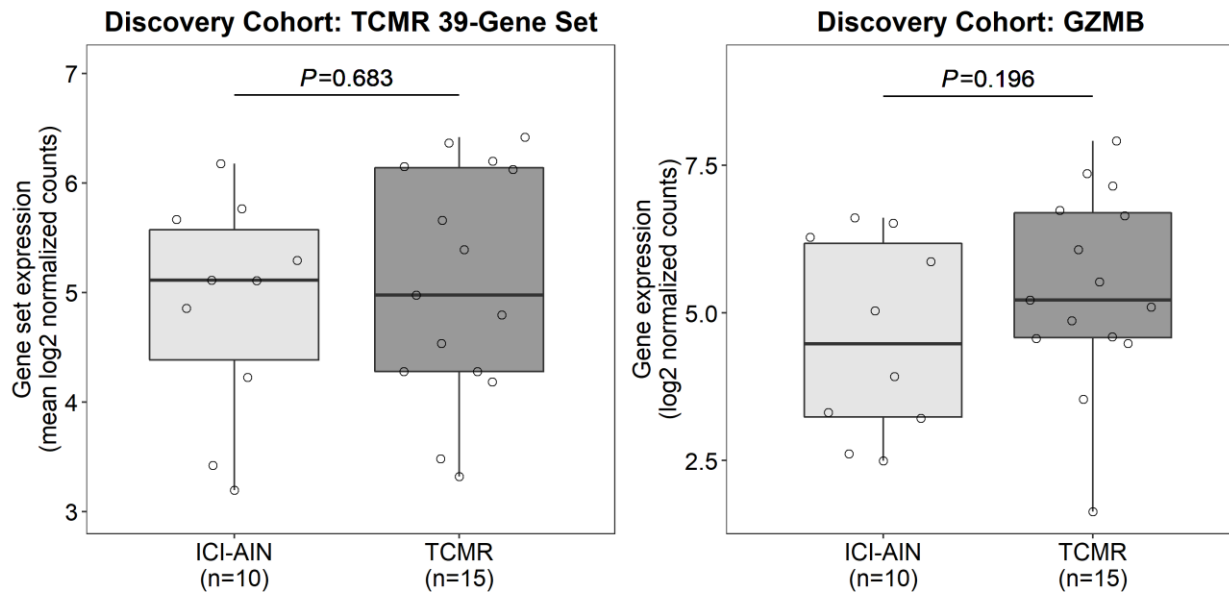

**Supplemental Figure 2. *IFI27* and *FOS* gene expression in discovery cohort T-cell mediated rejection according to Banff grade.** For *IFI27*, gene expression is higher in both Banff grades I and II TCMR versus ICI-AIN ( $P=0.001$  for both), but there is no significant difference between Banff grades ( $P=0.388$ ). Similarly, for *FOS*, gene expression is higher in both Banff grades I and II TCMR compared with ICI-AIN ( $P=0.016$  and  $P=0.008$ , respectively), but there is no difference between Banff grades ( $P=0.689$ ). These results suggest that increased *IFI27* and *FOS* gene expression in TCMR represents underlying pathophysiological mechanisms rather than immune response severity. ICI-AIN, immune checkpoint inhibitor-associated acute interstitial nephritis; TCMR, T-cell mediated rejection.

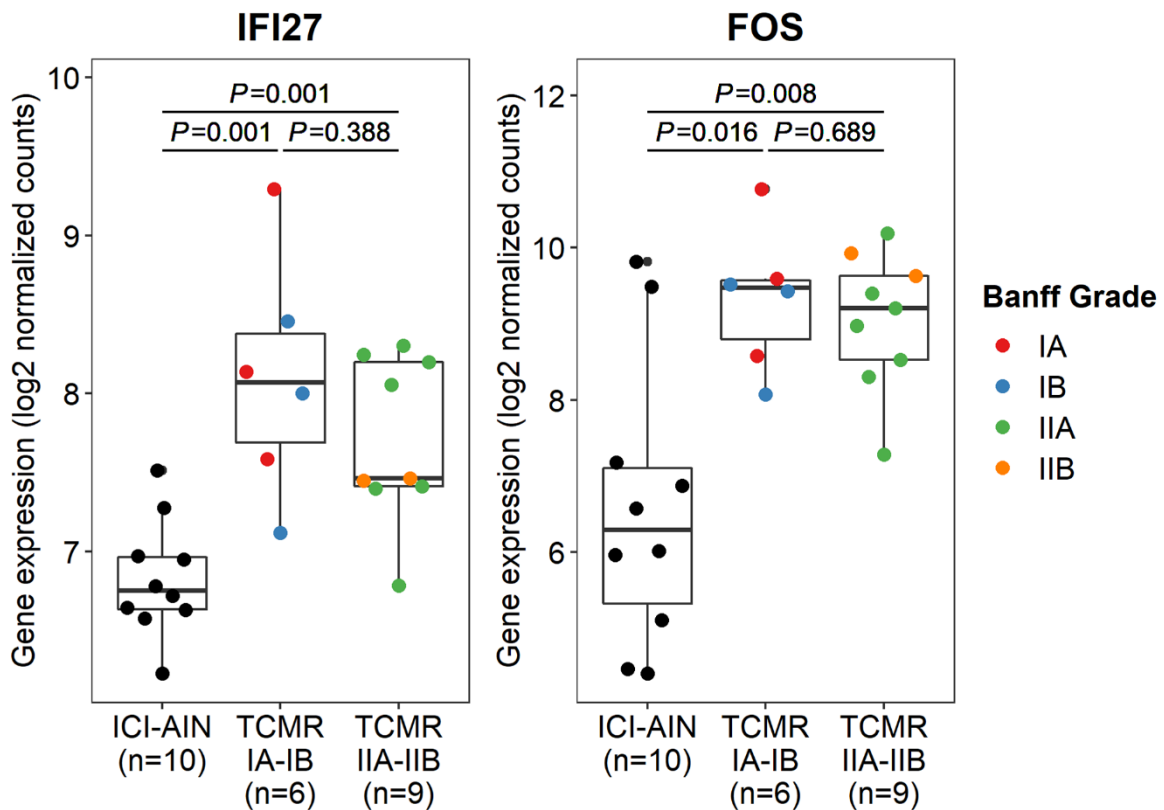

**Supplemental Figure 3. Differential gene expression in validation cohort.** Volcano plot shows fold change (y-axis) vs. linear regression p-value (x-axis) between immune checkpoint inhibitor-associated T-cell mediated rejection (ICI-TCMR) and immune checkpoint inhibitor-associated acute interstitial nephritis (ICI-AIN) for 725 immune-related genes. Blue, red and green points represent genes previously associated with T-cell mediated rejection, antibody-mediated rejection, and immune checkpoint pathway, respectively. After correction for multiple comparisons, no genes demonstrated statistically significant differential expression between ICI-TCMR and ICI-AIN (false discovery rate/FDR <0.05). However, *IFI27* was the second most relatively differentially expressed gene in ICI-TCMR vs. ICI-AIN (uncorrected  $P < 0.001$ , FDR=0.134), providing support for the identification of this gene in the discovery cohort and confirmation of its diagnostic performance in the validation cohort. In contrast, *FOS* demonstrated minimal differential expression in the validation cohort (uncorrected  $P = 0.368$ , FDR=0.544).

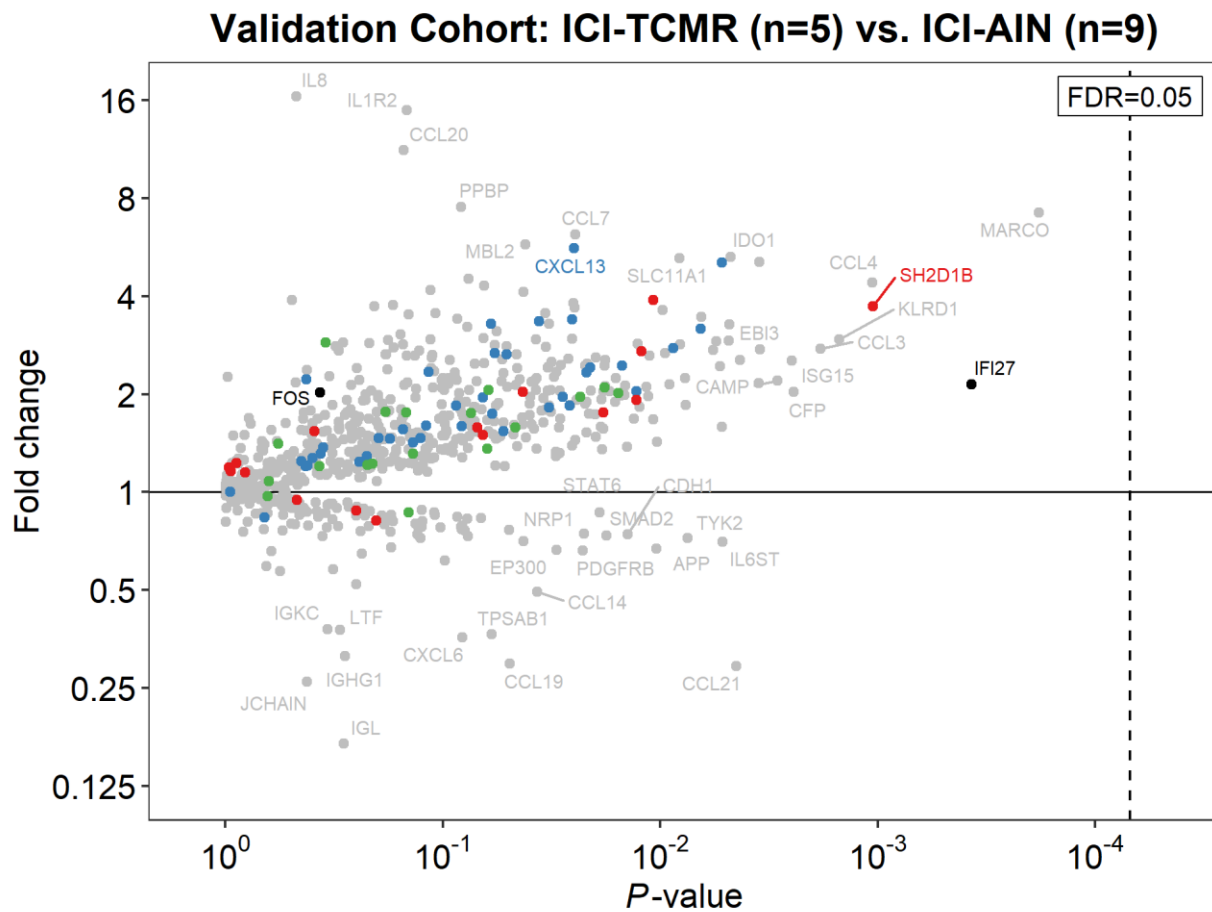

Supplement: CJN.00920121SupplementaryData.pdf [file CJN.00920121SupplementaryData.pdf]
